# Supplementary material for: Synergic effect of plasmonic gold nanoparticles and graphene oxide on the performance of glucose sensing
Source: Royal Society of Chemistry journal article supplement (doi:10.1039/c9nj04532e), 2019-01-01
Supplement: c9nj04532e1.pdf [file c9nj04532e1.pdf]

## New Journal of Chemistry

### Electronic Supplementary Information

#### Synergic effect of plasmonic Gold Nanoparticles and Graphene Oxide on the performance of Glucose sensing

Sadia Tabassum,<sup>a, b, φ</sup> Saira Naz,<sup>a, c, φ</sup> Amjad Nisar,<sup>a</sup> Hongyu Sun,<sup>d</sup> Shafqat Karim,<sup>a</sup> Maaz Khan,<sup>a</sup> Shiasta Shahzada,<sup>b</sup> Ata-ur-Rahman,<sup>c</sup> and Mashkooor Ahmad,<sup>a, \*</sup>

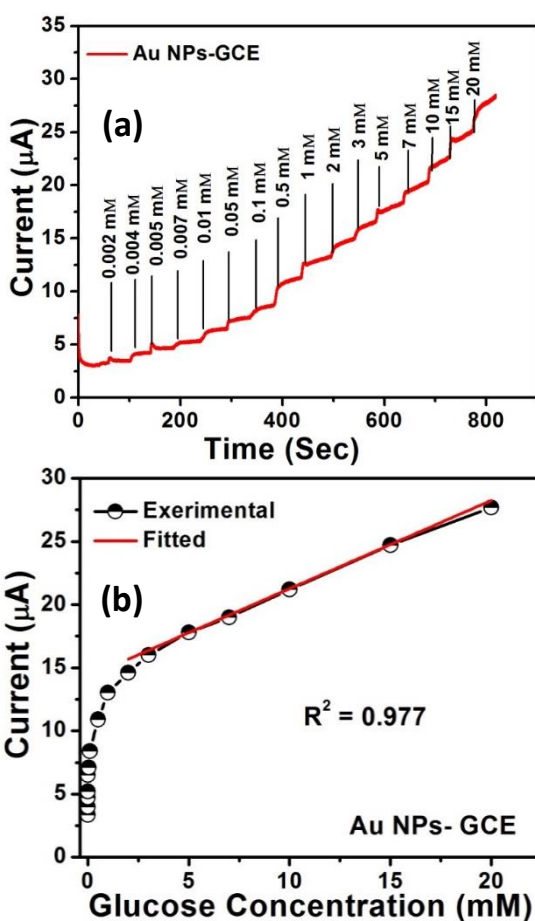

**Figure S1.** (a) Amperometric response of the Au-GCE biosensor in the presence of different concentrations of glucose at 0.6 V under stirring in a PB solution (b) corresponding calibration curve of the biosensor.
